# $\alpha_{2A}$ Adrenoceptors Contribute to Feedback Inhibition of Capsaicin-induced Hyperalgesia

Heikki Mansikka, M.D., Ph.D.,\* Janne Lähdesmäki, M.D., Ph.D.,† Mika Scheinin, M.D., Ph.D.,‡ Antti Pertovaara, M.D., Ph.D.§

**Background:** Studies on receptor knockout mice have so far shown that of the three  $\alpha_2$ -adrenoceptor subtypes, the  $\alpha_{2A}$  adrenoceptor has a major role in mediating the powerful central analgesia induced by synthetic  $\alpha_2$ -adrenoceptor agonists. However, because a knockout of the gene for the  $\alpha_{2A}$  adrenoceptor has produced only little if any change in the pain sensitivity of control, nerve-injured, or inflamed animals, it has not been clear whether activation of  $\alpha_{2A}$ -adrenoceptors by endogenous ligands has a significant pain regulatory role.

**Methods:** The authors assessed spontaneous pain behavior and mechanical hypersensitivity induced by administration of capsaicin in the colon or paw of  $\alpha_{2A}$ -adrenoceptor knockout mice versus their wild-type controls.

**Results:** Enhanced pain hypersensitivity was observed in  $\alpha_{2A}$ -adrenoceptor knockout mice 20 min or more after administration of capsaicin, but before, hypersensitivity and spontaneous pain were of equal magnitude in  $\alpha_{2A}$ -adrenoceptor knockout and wild-type mice. When wild-type mice were pretreated with an  $\alpha_2$ -adrenoceptor antagonist, capsaicin-induced pain hypersensitivity increased to a level equal to that in  $\alpha_{2A}$ -adrenoceptor knockout mice. Capsaicin-induced hypersensitivity was suppressed in wild-type but not  $\alpha_{2A}$ -adrenoceptor knockout mice by a centrally acting  $\alpha_2$ -adrenoceptor agonist, whereas a peripherally acting  $\alpha_2$ -adrenoceptor agonist was without effect on hypersensitivity, although it attenuated capsaicin-induced spontaneous pain behavior in wild-type mice.

**Conclusions:** This study shows that central  $\alpha_{2A}$ -adrenoceptors contribute to feedback inhibition of pain hypersensitivity. Also,  $\alpha_{2A}$ -adrenoceptors are critical for not only somatic but also visceral antinociceptive effects induced by synthetic  $\alpha_2$ -adrenoceptor agonists.

$\alpha_2$  ADRENOCEPTORS mediate analgesia,<sup>1</sup> but the  $\alpha_2$ -adrenoceptor subtypes ( $\alpha_{2A}$ ,  $\alpha_{2B}$ , and  $\alpha_{2C}$  adrenoceptors) involved in different aspects of pain regulation have not been identified in detail. Because of lack of subtype-selective drugs, it was difficult to study the functional role of various  $\alpha_2$ -adrenoceptor subtypes before development of subtype-selective  $\alpha_2$ -adrenoceptor knockout animals.<sup>2-5</sup> Previous investigations with subtype selective  $\alpha_2$ -adrenoceptor knockout mice revealed that the

powerful analgesia induced by  $\alpha_2$ -adrenergic agonists is dependent on the expression of  $\alpha_{2A}$  adrenoceptors.<sup>6-8</sup> Therefore, it might be expected that endogenous ligands activating  $\alpha_{2A}$  adrenoceptors have a significant role in physiologic pain regulation, and that this would be reflected as marked differences in pain behavior between  $\alpha_{2A}$ -adrenoceptor knockout mice and their wild-type controls. However, the baseline responses to short-term painful stimulation in  $\alpha_{2A}$ -adrenoceptor knockout mice have not differed from those in their wild-type controls,<sup>6-8</sup> nor did the development of hypersensitivity after carrageenan-induced inflammation<sup>9</sup> or nerve injury<sup>10</sup> depend on  $\alpha_{2A}$  adrenoceptors, with the exception of a sympathetically maintained component of heat hyperalgesia that is presumably controlled by peripheral  $\alpha_{2A}$  adrenoceptors.<sup>11</sup> These negative findings on the involvement of the  $\alpha_{2A}$  adrenoceptor in pain behavior contrast with the almost complete abolition of  $\alpha_2$ -adrenoceptor agonist-induced analgesia in the same studies and raise the question on the role of  $\alpha_{2A}$  adrenoceptors and their endogenous ligands (catecholamines) in physiologic pain regulation.

Because spinal  $\alpha_2$ -adrenoceptors, the main target of parenteral  $\alpha_2$ -adrenoceptor agonists, are endogenously activated by noradrenergic brainstem-spinal pathways,<sup>1</sup> we hypothesized that pain models inducing strong descending noradrenergic inhibition from the brainstem might be sensitive to knockout of the gene for the  $\alpha_{2A}$  adrenoceptor. Pain induced by capsaicin was considered a promising candidate in this respect because  $\alpha_2$ -adrenoceptor agonists with a preference for  $\alpha_{2A/D}$  adrenoceptors have been shown to reduce capsaicin-induced glutamate release in spinal synaptosomes.<sup>12</sup>

## Materials and Methods

### Experimental Animals

The experiments were performed using male  $\alpha_{2A}$ -adrenoceptor knockout and wild-type control mice of aged 15-21 weeks. Mice deficient in  $\alpha_{2A}$  adrenoceptors were generated by gene targeting, which has been described previously.<sup>13</sup> The  $\alpha_{2A}$ -adrenoceptor knockout mice were backcrossed for five generations to C57B1/6J mice to form a congenic strain. Age-matched wild-type C57B1/6J mice of the same genetic background (Jackson Laboratories, Bar Harbor, ME) were used as control animals. When comparing the wild-type and  $\alpha_{2A}$ -adrenoceptor knockout mice populations used in our laboratory, the binding of the  $\alpha_2$ -adrenoceptor specific but subtype non-selective antagonist radioligand [<sup>3</sup>H]RS-79948-197 is al-

\* Research Fellow, Department of Anesthesia and Intensive Care, Turku University Central Hospital. † Research Fellow, ‡ Professor of Clinical Pharmacology, Department of Pharmacology and Clinical Pharmacology, § Professor of Physiology, Department of Physiology, University of Turku.

Received from the Department of Physiology and Department of Pharmacology and Clinical Pharmacology, Institute of Biomedicine, University of Turku, Turku, Finland, and the Department of Anaesthesia and Intensive Care, Turku University Central Hospital, Turku, Finland. Submitted for publication December 12, 2003. Accepted for publication February 2, 2004. Supported by the Academy of Finland, Helsinki, Finland; the Sigrid Jusélius Foundation, Helsinki, Finland; the Paulo Foundation, Helsinki, Finland; and the Finnish Pain Research Association, Helsinki, Finland. The authors have received support from OrionPharma, Espoo, Finland, during the past 5 yr. A brief preliminary report was presented as a poster at the EuroPain 2003 Congress, Prague, Czech Republic, September 4, 2003.

Address correspondence to Dr. Pertovaara: Department of Physiology, Institute of Biomedicine, University of Turku, Kiinamyllynkatu 10, 20520 Turku, Finland. Address electronic mail to: antti.pertovaara@utu.fi. Individual article reprints may be purchased through the Journal Web site, www.anesthesiology.org.

most totally abolished (e.g., 83% reduction in receptor density in cortex) in the brains of  $\alpha_{2A}$ -adrenoceptor knockout mice.<sup>14</sup> The remaining binding is most prominent in brain regions known to contain the  $\alpha_{2C}$  adrenoceptor.<sup>14</sup> The animals were maintained on a 12-h light:dark cycle and were provided with food and water *ad libitum*. The  $\alpha_{2A}$ -adrenoceptor knockout mice could not be distinguished from the control mice by their appearance. For all behavioral experiments, the animals were allowed to habituate for 5 days to the testing environment and for 15 min before the actual testing was started. The research protocol was approved by the Institutional Animal Care Committee of the University of Turku and by the Regional Government of Western Finland. All efforts were made to minimize animal suffering and to use only the number of animals necessary to produce reliable scientific data. Each animal was used only once, and on completion of testing, the animal was killed by an overdose of pentobarbitone. Mice were studied with the investigator blinded to the genotype and the drug treatments.

#### Assessment of Pain and Hyperalgesia

Intracolonic capsaicin-induced spontaneous pain and referred hyperalgesia were assessed using the method developed by Laird *et al.*<sup>15,16</sup> Capsaicin (0.1%/50  $\mu$ l) was administered into the colon by introducing a fine cannula with a rounded tip *via* the anus. The spontaneous behavior was observed directly during 20 min after intracolonic capsaicin. The latency of the first pain-related behavior was recorded, as were the number and type of behaviors displayed. To assess the development of referred hyperalgesia, the frequency of withdrawal responses to the application of von Frey hairs to the abdomen and the hind paws was examined before and 20 min after the administration of capsaicin. Six hairs with forces of 0.06–3.6 g were applied five times each in ascending order of force, and the frequency of responses at each force was calculated. The data from the left and right hind paw were pooled. For statistical comparisons, the frequencies of responses to all stimulus forces were pooled in each time point of each condition.

When assessing the effects of intracolonic capsaicin, there were six experimental conditions in the wild-type group: (1) intracolonic vehicle (control); (2) intracolonic capsaicin alone; and (3–6) effects of dexmedetomidine (3 and 10  $\mu$ g/kg subcutaneously), atipamezole (1 mg/kg), and fadolmidine (100  $\mu$ g/kg) on capsaicin-induced pain and referred hyperalgesia.  $\alpha_2$ -Adrenergic compounds were administered 15 min before capsaicin. In the knockout group, only the effects by capsaicin alone and its modulation by dexmedetomidine at the higher dose (10  $\mu$ g/kg) or by atipamezole were assessed.

Because of a long-lasting spontaneous pain behavior induced by intracolonic capsaicin,<sup>15</sup> hyperalgesia to mechanical stimulation cannot be reliably studied in this

model until approximately 20 min after instillation of capsaicin. To assess capsaicin-induced mechanical hyperalgesia at an earlier time point, we used plantar injections of capsaicin because in this model, spontaneous pain behavior is considerably shorter.<sup>17</sup> The effects of intraplantar administration of capsaicin (10  $\mu$ g/20  $\mu$ l) on paw licking and mechanical sensitivity in the treated side and in the contralateral hind limb were assessed as described in detail elsewhere.<sup>17</sup> Because the plantar capsaicin model was only used to assess capsaicin-induced mechanical hyperalgesia at an earlier time point, the effects of  $\alpha_2$ -adrenergic compounds were not studied in this model.

#### Drugs

Dexmedetomidine and fadolmidine are  $\alpha_2$ -adrenoceptor agonists, and atipamezole is an  $\alpha_2$ -adrenoceptor antagonist (all provided by OrionPharma, Turku, Finland). None of these compounds are  $\alpha_2$ -adrenoceptor subtype selective. All these drugs were administered subcutaneously. When given centrally, fadolmidine and dexmedetomidine are equipotent.<sup>18</sup> Unlike atipamezole and dexmedetomidine, fadolmidine only poorly spreads to the central nervous system after peripheral administration.<sup>18</sup> Fadolmidine was used only to determine whether dexmedetomidine-induced effects were due to action on peripheral  $\alpha_2$  adrenoceptors. The dose of fadolmidine used (100  $\mu$ g/kg) was the highest not producing central effects after peripheral injection.<sup>18,19</sup> Fadolmidine was not used in animal groups that were insensitive to dexmedetomidine-induced effects. Also, to minimize the number of animals exposed to pain studies, the low dose of dexmedetomidine (3  $\mu$ g/kg) was not used in animal groups that were insensitive to the higher dose (10  $\mu$ g/kg).

#### Statistics

Spontaneous pain behavior and the data on hyperalgesia were analyzed using one-way or two-way analysis of variance, respectively, followed by the Tukey test. The Student *t* test was used to compare differences between two groups. *P* < 0.05 was considered to represent a significant difference.

## Results

#### Effects of Intracolonic Capsaicin

After intracolonic administration of capsaicin, the latency to the first pain-related spontaneous behavioral response was significantly shorter in the wild-type mice than in the knockout animals. Administration of dexmedetomidine, an  $\alpha_2$ -adrenoceptor agonist, prolonged in a dose-related fashion the onset latency of visceral pain in wild-type animals, whereas it had no effect in knockout animals (fig. 1A). During the first 20 min after intracolonic administration of capsaicin, the number of spontaneous

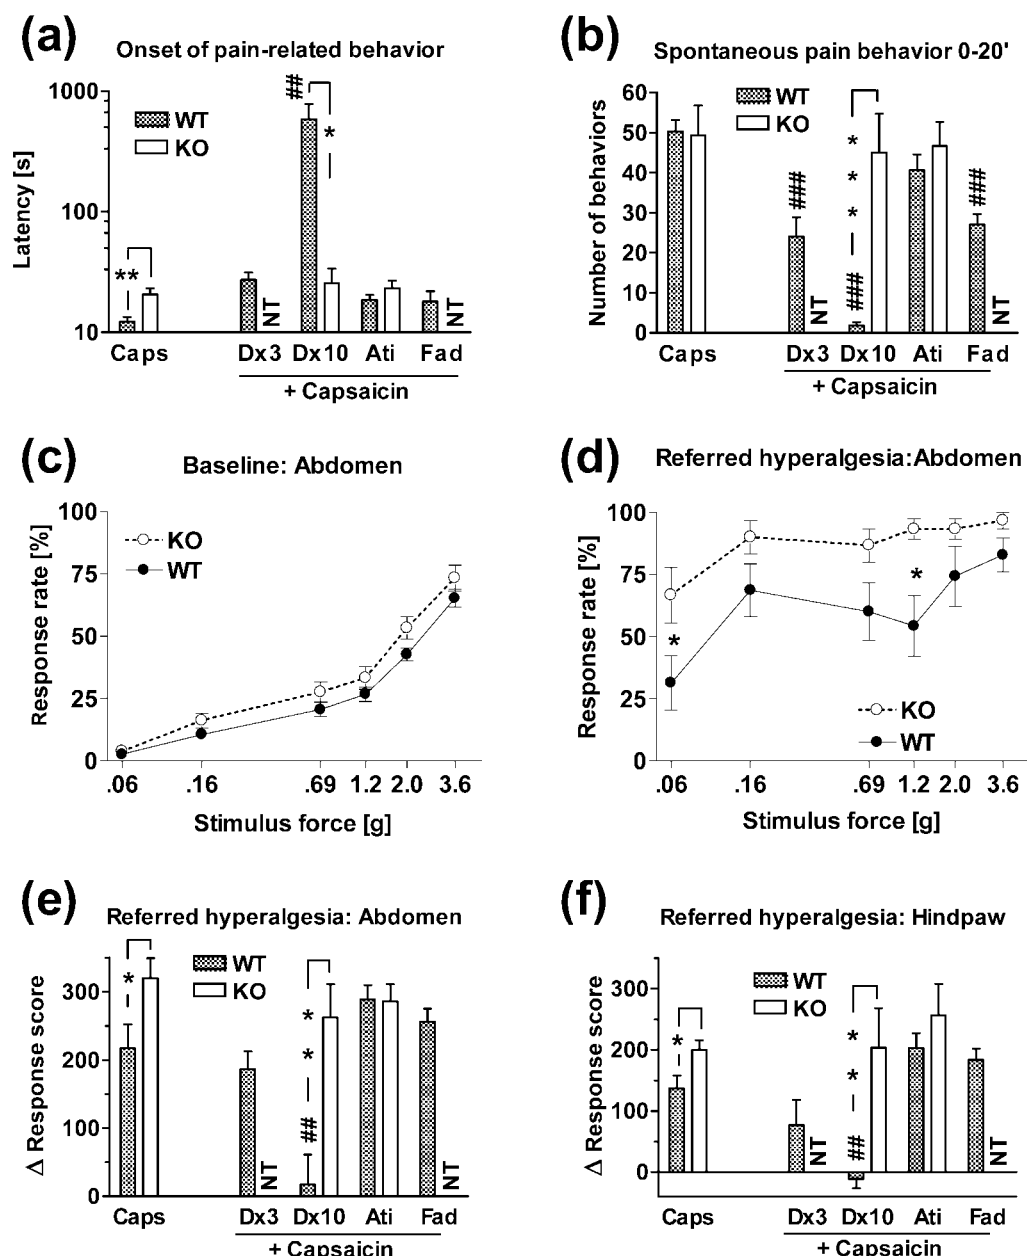

**Fig. 1.** Pain behavior and referred hyperalgesia induced by intracolonic capsaicin in wild-type (WT) and  $\alpha_{2A}$ -adrenoceptor knockout (KO) mice. (A) Latency to first behavior. (B) Behavioral reactions in the first 20 min after administration. (C) Baseline responses to mechanical stimulation of the abdomen with von Frey hairs. (D) Responses to mechanical stimulation of the abdomen 20–30 min after instillation of capsaicin. (E and F) Responses to mechanical stimulation of the abdomen and the hind paw, respectively, in different drug-treatment conditions. In C and D, data are shown as mean percent response frequency at each stimulus intensity. In E and F, response frequencies at all stimulus intensities in each drug treatment condition are pooled, and the differences between the pooled data obtained after and before treatments are shown (scores > 0 indicate a hyperalgesic effect).  $n = 6-8/\text{group}$ . The error bars represent SEMs. Ati = 1 mg/kg atipamezole; Caps = capsaicin; Dx3 = 3  $\mu\text{g/kg}$  dexmedetomidine; Dx10 = 10  $\mu\text{g/kg}$  dexmedetomidine; Fad = 100  $\mu\text{g/kg}$  fadolmidine; NT = not tested (missing groups). \* Significant difference between wild-type and knockout groups; # significant difference from the corresponding capsaicin group (\*  $t$  test, # Tukey test: \*  $P < 0.05$ , \*\*  $P < 0.01$ , \*\*\*  $P < 0.005$ ).

pain behaviors was not significantly different between the wild-type and knockout groups. Dexmedetomidine induced a dose-related reduction in the number of pain behaviors in the wild-type group but not in the knockout group (fig. 1B). Fadolmidine, an  $\alpha_2$ -adrenoceptor agonist penetrating poorly the blood-brain barrier, did not in-

fluence the onset latency of pain behavior, but it attenuated the number of spontaneous pain behaviors during the first 20 min after intracolonic administration of capsaicin in the wild-type group.

Baseline responses to von Frey hair stimulation of the skin of the abdomen (fig. 1C) or the hind paw (not

shown) were not different between the wild-type and knockout groups. Assessment of referred hyperalgesia started after cessation of spontaneous pain behavior, 20 min after intracolonic instillation of capsaicin. The von Frey hair-induced responses were markedly increased after capsaicin in both groups (fig. 1D), but the increase (an index of referred hyperalgesia) was significantly larger in knockout mice than in wild-type mice (in the hind paw:  $F_{1,66} = 5.99$ ,  $P < 0.02$ ; in the abdomen:  $F_{1,66} = 22.84$ ,  $P < 0.0001$ ). The referred hyperalgesia was suppressed in a dose-related fashion by dexmedetomidine in the wild-type group but not in the knockout group (figs. 1E and F). Fadolmidine did not suppress referred hyperalgesia. After atipamezole, an  $\alpha_2$ -adrenoceptor antagonist, the difference in the magnitude of referred hyperalgesia between the wild-type group and the knockout group disappeared. Intracolonic vehicle had no effects ( $n = 5$ ; not shown).

#### Effects of Intraplantar Capsaicin

Spontaneous pain behavior (licking) during the first 10 min after intraplantar administration of capsaicin was of equal magnitude in the wild-type and knockout groups (fig. 2A).

Application of von Frey hairs to the hind paw resulted in equal baseline responses in the wild-type and knockout groups (fig. 2B). Ten minutes after intraplantar capsaicin, the responses to von Frey hairs were markedly increased in both groups, indicating development of hyperalgesia. Plantar hyperalgesia at the 10-min time point was of equal magnitude in the wild-type and knockout groups (fig. 2B). Thirty minutes after application of capsaicin, the hyperalgesia had completely recovered to the baseline level in the wild-type group but not in the knockout group (fig. 2C).

## Discussion

#### $\alpha_{2A}$ Adrenoceptors Are Involved in Physiologic Regulation of Pain

This is the first study to show that the  $\alpha_{2A}$  adrenoceptor has a major role, not only in mediating analgesic actions of synthetic  $\alpha_2$ -adrenergic agonists,<sup>6-8</sup> but also in physiologic regulation of pain hypersensitivity by endogenous ligands (catecholamines). The referred hyperalgesia induced by capsaicin was significantly enhanced in the  $\alpha_{2A}$ -adrenoceptor knockout group of animals, indicating lack of feedback inhibition. When the  $\alpha_2$ -adrenergic feedback inhibition was blocked by atipamezole, referred hyperalgesia in wild-type animals increased to a level equal to that in the  $\alpha_{2A}$ -adrenoceptor knockout group. This feedback inhibition was not observed in the  $\alpha_{2A}$ -adrenoceptor knockout group until 20 min or more after intracolonic administration of capsaicin, and a block of the  $\alpha_2$ -adrenergic feedback inhibition by atipa-

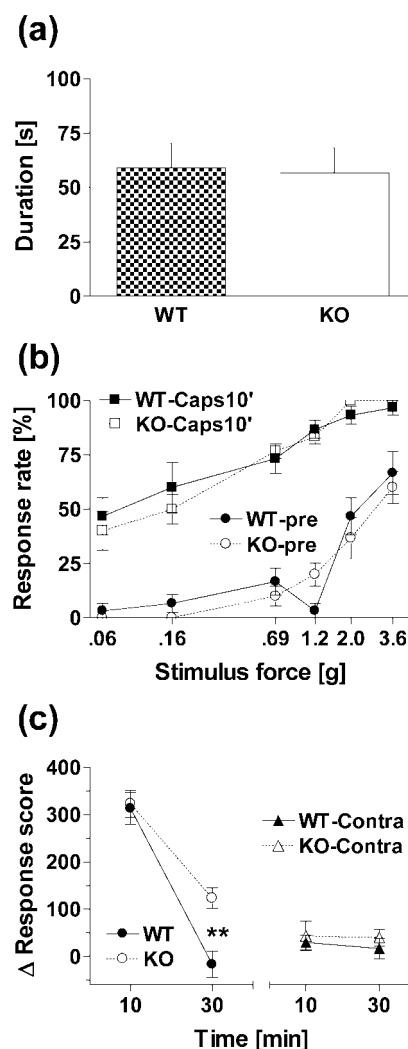

Fig. 2. Pain behavior and hyperalgesia induced by intraplantar capsaicin in wild-type (WT) and  $\alpha_{2A}$ -adrenoceptor knockout (KO) mice. (A) Duration of licking behavior in the first 10 min after administration. (B) Responses to mechanical stimulation of the hind paw with von Frey hairs in the baseline condition (pre) and 10 min after injection of capsaicin (Caps). (C) Responses to mechanical stimulation of the hind paw 10 and 30 min after capsaicin ipsilateral (left) and contralateral (right) to the injection. In B, data are shown as mean percent response frequency at each stimulus intensity. In C, response frequencies at all stimulus intensities in each condition are pooled, and the differences between the pooled data obtained after and before capsaicin treatment are shown (score  $> 0$  represents hyperalgesia).  $n = 6/\text{group}$ . The error bars represent SEMs.  $**P < 0.01$  ( $t$  test).

mezole did not influence pain responses within the first 20 min after capsaicin instillation in wild-type animals. The enhanced hyperalgesia induced by intraplantar capsaicin was not observed in the  $\alpha_{2A}$ -adrenoceptor knockout group until the recovery phase, when the thresholds in the wild-type group were already back to baseline levels. The feedback inhibition involving  $\alpha_{2A}$  adrenoceptors is not tonically active in nonpainful conditions, as shown by the baseline responses to short-term painful stimulation in this and earlier studies performed with



$\alpha_{2A}$ -adrenoceptor knockout mice,<sup>6-11</sup> nor are carrageenan-induced inflammation<sup>9</sup> or chronic nerve injury<sup>10</sup> sufficient stimuli to activate the feedback inhibition involving  $\alpha_{2A}$  adrenoceptors. The findings that, in the wild-type animals, a peripherally acting  $\alpha_2$  adrenoceptor agonist had no antihyperalgesic effect, whereas a centrally acting  $\alpha_2$ -adrenoceptor agonist induced strong antihyperalgesia indicate that the  $\alpha_2$ -adrenergic feedback inhibition of hypersensitivity was a central phenomenon, presumably due to activation of descending axons from noradrenergic nuclei of the brainstem.<sup>20,21</sup> Interestingly, although a peripherally acting  $\alpha_2$  adrenoceptor agonist did not attenuate capsaicin-induced hypersensitivity, it attenuated spontaneous pain behaviors, suggesting that peripheral  $\alpha_2$  adrenoceptors may have a selective role in contributing to the antinociceptive actions of  $\alpha_2$ -adrenoceptor agonists on capsaicin-induced spontaneous pain. Noradrenaline released from terminals of descending axons may have produced a central antihyperalgesic effect due to action on  $\alpha_{2A}$  adrenoceptors in central terminals of primary afferent nociceptors, spinal neurons, or both.<sup>1</sup> The role of supraspinal  $\alpha_2$  adrenoceptors in attenuation of nociceptive reflex responses has not been as well established as that of spinal  $\alpha_2$  adrenoceptors. More variable effects produced by supraspinal<sup>22-24</sup> than spinal<sup>1</sup> administration of  $\alpha_2$ -adrenoceptor agonists on spinal nociception may reflect the higher complexity of supraspinal pain control circuitries. Therefore, although  $\alpha_{2A}$  adrenoceptors at the spinal cord level may explain the  $\alpha_2$ -adrenergic antihyperalgesia in the current study, we cannot exclude the possibility that also supraspinal  $\alpha_{2A}$  adrenoceptors are involved in the capsaicin-induced central feedback inhibition of spinal hypersensitivity.

Paradoxically, the  $\alpha_{2A}$ -adrenoceptor knockout group had a prolonged latency to the onset of spontaneous pain behavior after intracolonic capsaicin. This reduction in sensitivity at the start of painful stimulation might be explained by increased release of noradrenaline due to lack of release-inhibiting  $\alpha_{2A}$  adrenoceptors<sup>14,25</sup> and subsequent activation of spinal  $\alpha_{2C}$  adrenoceptors that may also contribute to regulation of pain.<sup>26</sup> Alternatively, the delayed response onset might be due to compensatory up-regulation of other pain inhibitory mechanisms. However, such adaptations have minor effects as indicated by normal baseline responses in other pain tests.<sup>9</sup>

#### *$\alpha_{2A}$ Adrenoceptors Mediate Visceral Antinociception Induced by Synthetic $\alpha_2$ -Adrenoceptor Agonists*

Earlier studies demonstrating the importance of  $\alpha_{2A}$  adrenoceptors for the  $\alpha_2$ -adrenoceptor agonist-induced analgesia used experimental models of somatic pain.<sup>6-8</sup> The current results extend these findings by showing that  $\alpha_{2A}$  adrenoceptors are critical not only for somatic but also for visceral antinociceptive effects induced by synthetic  $\alpha_2$ -adrenoceptor agonists. Moreover, because

visceral antinociceptive efficacy was strongest after peripheral drug administration of an  $\alpha_2$ -adrenoceptor agonist spreading centrally, attenuation of visceral pain behavior was predominantly due to action on  $\alpha_{2A}$  adrenoceptors within the central nervous system. This is in accord with previous evidence indicating that spinal administration of  $\alpha_2$ -adrenoceptor agonists produces visceral antinociception.<sup>27-29</sup>

#### *Delayed Suppression of Pain Hypersensitivity: Possible Explanations*

The  $\alpha_{2A}$ -adrenoceptor-dependent feedback inhibition was not observed until 20 min after administration of capsaicin, independent of whether hyperalgesia was induced by intracolonic or intraplantar capsaicin and independent of whether the contribution of this feedback inhibition was revealed by a knockout of the  $\alpha_{2A}$  adrenoceptor or by administering a synthetic  $\alpha_2$ -adrenoceptor antagonist in wild-type animals. These findings suggest that the  $\alpha_{2A}$ -adrenoceptor-dependent feedback inhibition had a slow onset. The earlier finding that  $\alpha_2$ -adrenoceptor antagonists predominantly enhanced late responses of nociceptive spinal dorsal horn neurons to formalin<sup>30</sup> supports the hypothesis that the  $\alpha_2$ -adrenergic feedback inhibition suppresses pain after a delay. A slow onset of feedback inhibition could be due to a delayed activation of pain inhibitory mechanisms. One possible mechanism contributing to a delay in the feedback inhibition would be if a significant amount of noradrenaline released from descending axon terminals did not act on spinal  $\alpha_{2A}$  adrenoceptors through classic synaptic mechanisms, but interactions of noradrenaline with spinal  $\alpha_{2A}$  adrenoceptors occurred predominantly *via* volume transmission.

It might be argued that the  $\alpha_{2A}$ -adrenoceptor-dependent feedback inhibition did not have a slow onset, but it selectively attenuated hypersensitivity without influencing spontaneous pain behavior induced by intracolonic capsaicin. Because of long-lasting spontaneous pain behavior induced by intracolonic capsaicin, mechanical hypersensitivity could not be assessed earlier in this model than at a time point of 20 min. However, in animals treated with intraplantar capsaicin, it was possible to assess hypersensitivity in an earlier time point, because in this model, the duration of spontaneous pain behavior was shorter. Importantly, hypersensitivity induced by intraplantar capsaicin was not different between the wild-type and  $\alpha_{2A}$ -adrenoceptor knockout mice in an earlier time point of 10 min but only in a late time point of 30 min. This result is in accord with the hypothesis that the noradrenergic feedback inhibition had a slow onset in producing antihyperalgesia. However, further studies are still needed to exclude the possibility that the early response to capsaicin as well as formalin may be too strong to be suppressed by noradrenergic feedback inhibition, and consequently, the  $\alpha_{2A}$ -

adrenoceptor-dependent pain suppressive effect is observed only after a delay when the nociceptive afferent barrage is weaker.

After blockade of  $\alpha_{2A}$  adrenoceptors by a synthetic antagonist atipamezole or genetic engineering, a prominent enhancement of pain-related responses was observed in a capsaicin-induced pain model producing a significant amount of spontaneous pain behavior. In line with this, pain-related responses evoked by formalin, another chemical producing spontaneous pain behavior, were enhanced after administration of  $\alpha_2$ -adrenoceptor antagonists.<sup>30</sup> In contrast, a knockout of  $\alpha_{2A}$  adrenoceptors has not caused marked changes in baseline pain sensitivity in models that do not produce significant amounts of spontaneous pain behavior.<sup>6-11</sup> These findings indicate that the intensity of painful stimulation may be an important parameter determining the activation of  $\alpha_{2A}$ -adrenergic feedback inhibition. However, a decrease of formalin-induced pain behavior has also been reported after administration of yohimbine, a synthetic  $\alpha_2$ -adrenoceptor antagonist,<sup>31</sup> and a lesion of descending noradrenergic pathways with toxins.<sup>32,33</sup> Yohimbine and atipamezole have a marked difference in their selectivity for the  $\alpha_2$  adrenoceptor,<sup>34</sup> which might contribute to the difference in their pain modulatory effects. It remains to be determined whether denervation-induced plasticity might explain why a lesion of descending noradrenergic pathways by toxins produced a suppression of sustained pain behavior,<sup>32,33</sup> whereas the opposite effect was observed after a blockade of  $\alpha_2$ -adrenergic feedback inhibition by a highly selective antagonist and a knockout of  $\alpha_{2A}$  adrenoceptors.

## References

- Pertovaara A: Antinociception induced by alpha-2-adrenoceptor agonists, with special emphasis on medetomidine studies. *Prog Neurobiol* 1993; 40:691-709
- Hein L: Transgenic mouse models of  $\alpha_2$ -adrenergic receptor subtype function. *Rev Physiol Biochem Pharmacol* 2001; 142:161-85
- Kable JW, Murrin LC, Bylund DB: In vivo gene modification elucidates subtype specific functions of alpha-2-adrenergic receptors. *J Pharmacol Exp Ther* 2000; 293:1-7
- Lähdesmäki J, Sallinen J, MacDonald E, Sirviö J, Scheinin M:  $\alpha_2$ -Adrenergic drug effects on brain monoamines, locomotion, and body temperature are largely abolished in mice lacking the  $\alpha_{2A}$ -adrenoceptor subtype. *Neuropharmacology* 2003; 44:882-92
- MacDonald E, Kobilka BK, Scheinin M: Gene targeting: Homing in on alpha-2-adrenoceptor subtype function. *Trends Pharmacol Sci* 1997; 18:211-9
- Hunter JC, Fontana DJ, Hedley LR, Jasper JR, Lewis R, Link RE, Secchi R, Sutton J, Eglen RM: Assessment of the role of alpha-2-adrenoceptor subtypes in the antinociceptive, sedative and hypothermic action of dexmedetomidine in transgenic mice. *Br J Pharmacol* 1997; 122:1339-44
- Lakhlani PP, MacMillan LB, Guo TZ, McCool BA, Lovinger DM, Maze M, Limbird LE: Substitution of a mutant alpha-2A-adrenergic receptor via 'hit and run' gene targeting reveals the role of this subtype in sedative, analgesic and anesthetic-sparing responses in vivo. *Proc Natl Acad Sci U S A* 1997; 94:9950-5
- Stone LS, MacMillan LB, Kitto KF, Limbird LE, Wilcox GL: The alpha-2A-adrenergic receptor subtype mediates spinal analgesia evoked by alpha-2-agonists and is necessary for spinal adrenergic-opioid synergy. *J Neurosci* 1997; 17:7157-65
- Lähdesmäki J, Scheinin M, Pertovaara A, Mansikka H: The  $\alpha_{2A}$ -adrenoceptor subtype is not involved in inflammatory hyperalgesia or morphine-induced antinociception. *Eur J Pharmacol* 2003; 468:183-9
- Malmberg AB, Hedley LR, Jasper JR, Hunter JC, Basbaum AI: Contribution of  $\alpha_2$  receptor subtypes to nerve injury-induced pain and its regulation by dexmedetomidine. *Br J Pharmacol* 2001; 132:1827-36
- Kingery WS, Guo TZ, Davies FM, Limbird L, Maze M: The  $\alpha_{2A}$  adrenoceptor and the sympathetic postganglionic neuron contribute to the development of neuropathic heat hyperalgesia in mice. *Pain* 2000; 85:345-58
- Li X, Eisenach JC:  $\alpha_{2A}$ -Adrenoceptor stimulation reduces capsaicin-induced glutamate release from spinal cord synaptosomes. *J Pharmacol Exp Ther* 2001; 299:939-44
- Altman JD, Trendelenburg AU, MacMillan L, Bernstein D, Limbird L, Starke K, Kobilka BK, Hein L: Abnormal regulation of the sympathetic nervous system in the alpha-2A-adrenergic receptor knockout mice. *Mol Pharmacol* 1999; 56:154-61
- Lähdesmäki J, Sallinen J, MacDonald E, Kobilka BK, Fagerholm V, Scheinin M: Behavioural and neurochemical characterization of alpha(2A)-adrenergic receptor knockout mice. *Neuroscience* 2002; 113:289-99
- Laird JMA, Martinez-Caro L, Garcia-Nicas E, Cervero F: A new model of visceral pain and referred hyperalgesia in the mouse. *Pain* 2001; 92:335-42
- Laird JMA, Soustova V, Wood JN, Cervero F: Deficits in visceral pain and referred hyperalgesia in Nav1.8 (SNS/PN3)-null mice. *J Neurosci* 2002; 22:8352-6
- Mansikka H, Shiotani M, Winchurch R, Raja SN: Neurokinin-1 receptors are involved in behavioral responses to high-intensity heat stimuli and capsaicin-induced hyperalgesia in mice. *ANESTHESIOLOGY* 1999; 90:1643-9
- Pertovaara A, Wei H: Attenuation of ascending nociceptive signals to the rostroventromedial medulla induced by alpha-2-adrenoceptor agonist, MPV-2426, following intrathecal application in neuropathic rats. *ANESTHESIOLOGY* 2000; 92:1082-92
- Wei H, Jyvasjarvi E, Niissalo S, Hukkanen M, Waris E, Kontinen YT, Pertovaara A: The influence of chemical sympathectomy on pain responsiveness and alpha-2-adrenergic antinociception in neuropathic animals. *Neuroscience* 2002; 114:655-68
- Tsuruoka M, Willis WD: Bilateral lesions in the area of the nucleus locus coeruleus affect the development of hyperalgesia during carrageenan-induced inflammation. *Brain Res* 1996; 726:233-6
- Tyce GM, Yaksh TL: Monoamine release from cat spinal cord by somatic stimuli: an intrinsic modulatory system. *J Physiol (Lond)* 1981; 314:513-29
- Mansikka H, Idänpää-Heikkilä JJ, Pertovaara A: Different roles of alpha-2-adrenoceptors of the medulla versus the spinal cord in modulation of mustard oil-induced central hyperalgesia in rats. *Eur J Pharmacol* 1996; 297:19-26
- Xu M, Wei H, Kontinen VK, Kalso E, Pertovaara A: The dissociation of sedative from spinal antinociceptive effects following administration of a novel alpha-2-adrenoceptor agonist, MPV-2426, in the locus coeruleus in the rat. *Acta Anaesthesiol Scand* 2000; 44:648-55
- Guo TZ, Jiang JY, Buttermann AE, Maze M: Dexmedetomidine injection into the locus ceruleus produces antinociception. *ANESTHESIOLOGY* 1996; 84:873-81
- Hein L, Altman JD, Kobilka BK: Two functionally distinct alpha-2-adrenergic receptors regulate sympathetic neurotransmission. *Nature* 1999; 402:181-4
- Fairbanks CA, Stone LS, Kitto KF, Nguyen HO, Posthumus IJ, Wilcox GL: Alpha-2C-adrenergic receptors mediate spinal analgesia and adrenergic-opioid synergy. *J Pharmacol Exp Ther* 2002; 300:282-90
- Danzebrink RM, Gebhart GF: Antinociceptive effects of intrathecal adrenoceptor agonists in a rat model of visceral antinociception. *J Pharmacol Exp Ther* 1990; 253:698-705
- Harada Y, Nishioka K, Kitahata I, Kishikawa K, Collins JG: Visceral antinociceptive effects of spinal clonidine combined with morphine, [D-Pen2, D-Pen5]enkephalin, or U50,488H. *ANESTHESIOLOGY* 1995; 83:344-52
- Pertovaara A, Kalmari J: Comparison of the visceral antinociceptive effects of spinally administered MPV-2426 (fadolmidine) and clonidine in the rat. *ANESTHESIOLOGY* 2003; 98:189-94
- Green GM, Lyons L, Dickenson AH: Alpha-2-adrenoceptor antagonists enhance responses of dorsal horn neurones to formalin induced inflammation. *Eur J Pharmacol* 1998; 347:201-4
- Kanui TI, Tjolsen A, Lund A, Mjellem-Joly N, Hole K: Antinociceptive effects of intrathecal administration of alpha-adrenoceptor antagonists and clonidine in the formalin test in the mouse. *Neuropharmacology* 1993; 32:367-71
- Fasmer OB, Berge OG, Tveiten L, Hole K: Changes in nociception after 6-hydroxydopamine lesions of descending catecholaminergic pathways in mice. *Pharmacol Biochem Behav* 1986; 24:1441-4
- Martin WJ, Gupta NK, Loo CM, Rohde DS, Basbaum AI: Differential effects of neurotoxic destruction of descending noradrenergic pathways on acute and persistent nociceptive processing. *Pain* 1999; 80:57-65
- Haapalinna A, Viitamaa T, MacDonald E, Savola JM, Tuomisto L, Virtanen R, Heinonen E: Evaluation of the effects of a specific alpha-2-adrenoceptor antagonist, atipamezole, on alpha-1- and alpha-2-adrenoceptor subtype binding, brain neurochemistry and behaviour in comparison with yohimbine. *Naunyn-Schmiedeberg Arch Pharmacol* 1997; 356:570-82
